# Supplementary material
Source: PubMed Central journal article supplement (PMC2981806)

Supplementary material for:

Article title: Structure-Activity Relationships on the Odor Detectability of Homologous Carboxylic Acids by Humans

Journal: Experimental Brain Research

Authors: J. Enrique Cometto-Muñiz<sup>1</sup> and Michael H. Abraham<sup>2</sup>

Affiliations: <sup>1</sup>Chemosensory Perception Laboratory, Dept. of Surgery (Otolaryngology), University of California, San Diego, La Jolla, CA 92093-0957, USA

<sup>2</sup>Department of Chemistry, University College London, 20 Gordon Street, London WC1H 0AJ, UK

E-mail: [ecometto@ucsd.edu](mailto:ecometto@ucsd.edu) (corresponding author)

### Supplementary Figure Legends

Supplementary Figure S1. Individual subject functions for the odor detectability of formic acid. Each function represents the outcome of 280 trials for that participant (35 trials per concentration).

Supplementary Figure S2. Same as S1 but for acetic acid.

Supplementary Figure S3. Same as S1 but for butyric acid.

Supplementary Figure S4. Same as S1 but for hexanoic acid.

Supplementary Figure S5. Same as S1 but for octanoic acid.

Supplementary Figure S6. Individual plots of detection probability (left y-axis, filled symbols, continuous lines) and confidence ratings (right y-axis, empty symbols, dashed lines) as a function of vapor concentration (log ppb) for the most sensitive (circles) and the least sensitive (squares) subject for each carboxylic acid. Also shown are the

respective individual ODTs, and the ODT ratio between least and most sensitive subject for each acid.

SUPPLEMENTARY FIGURE S1

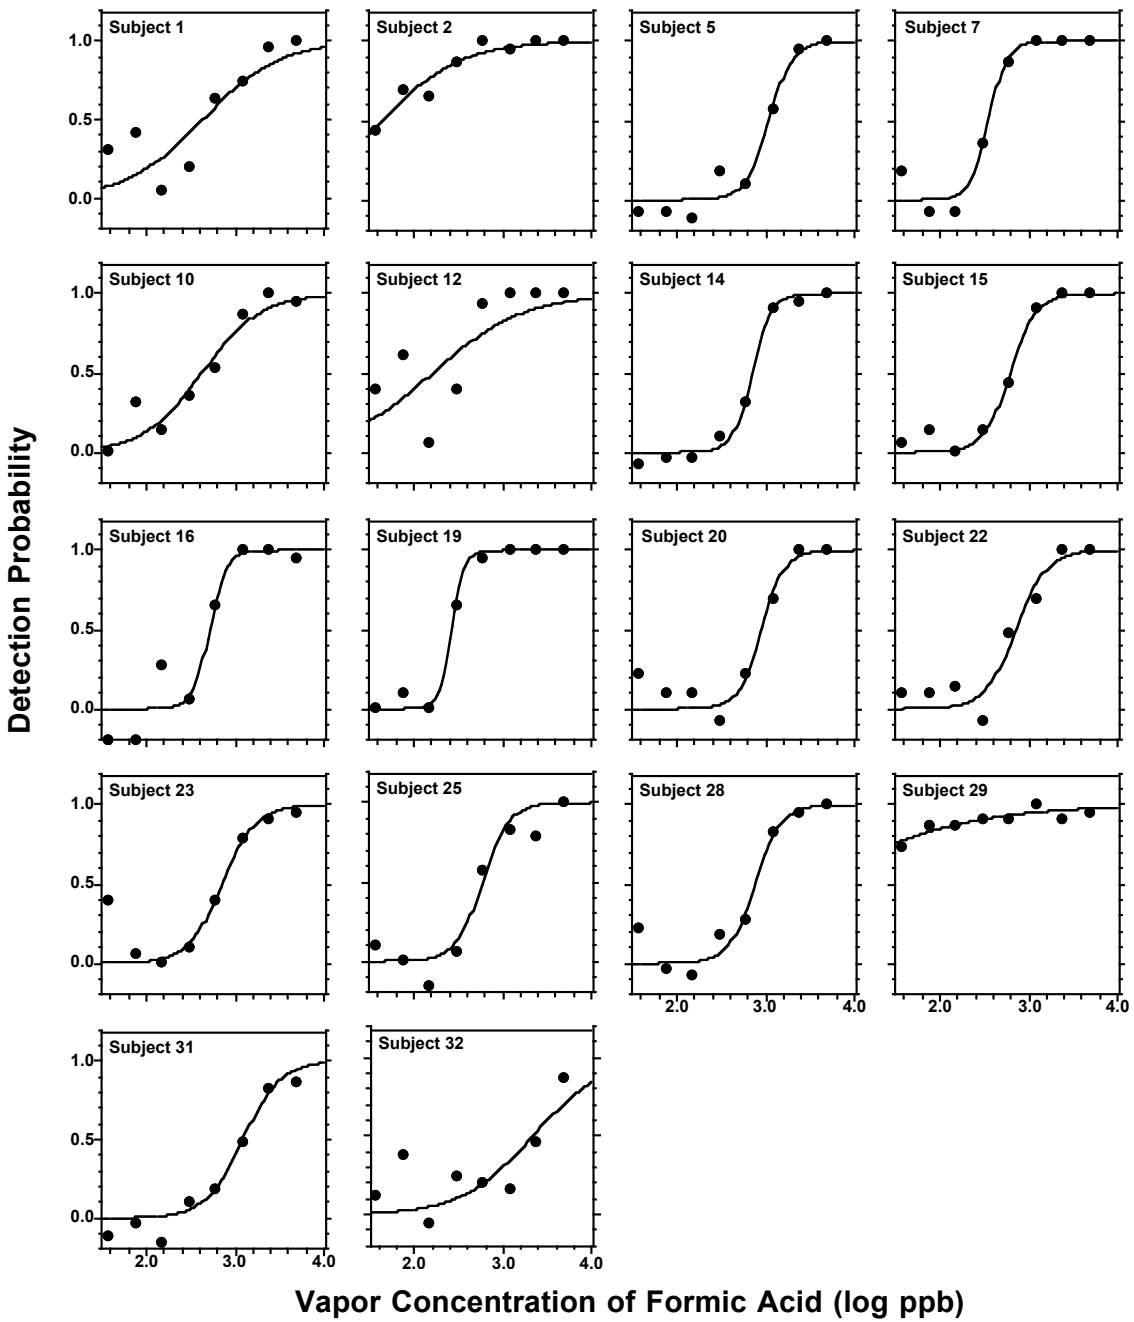

SUPPLEMENTARY FIGURE S2

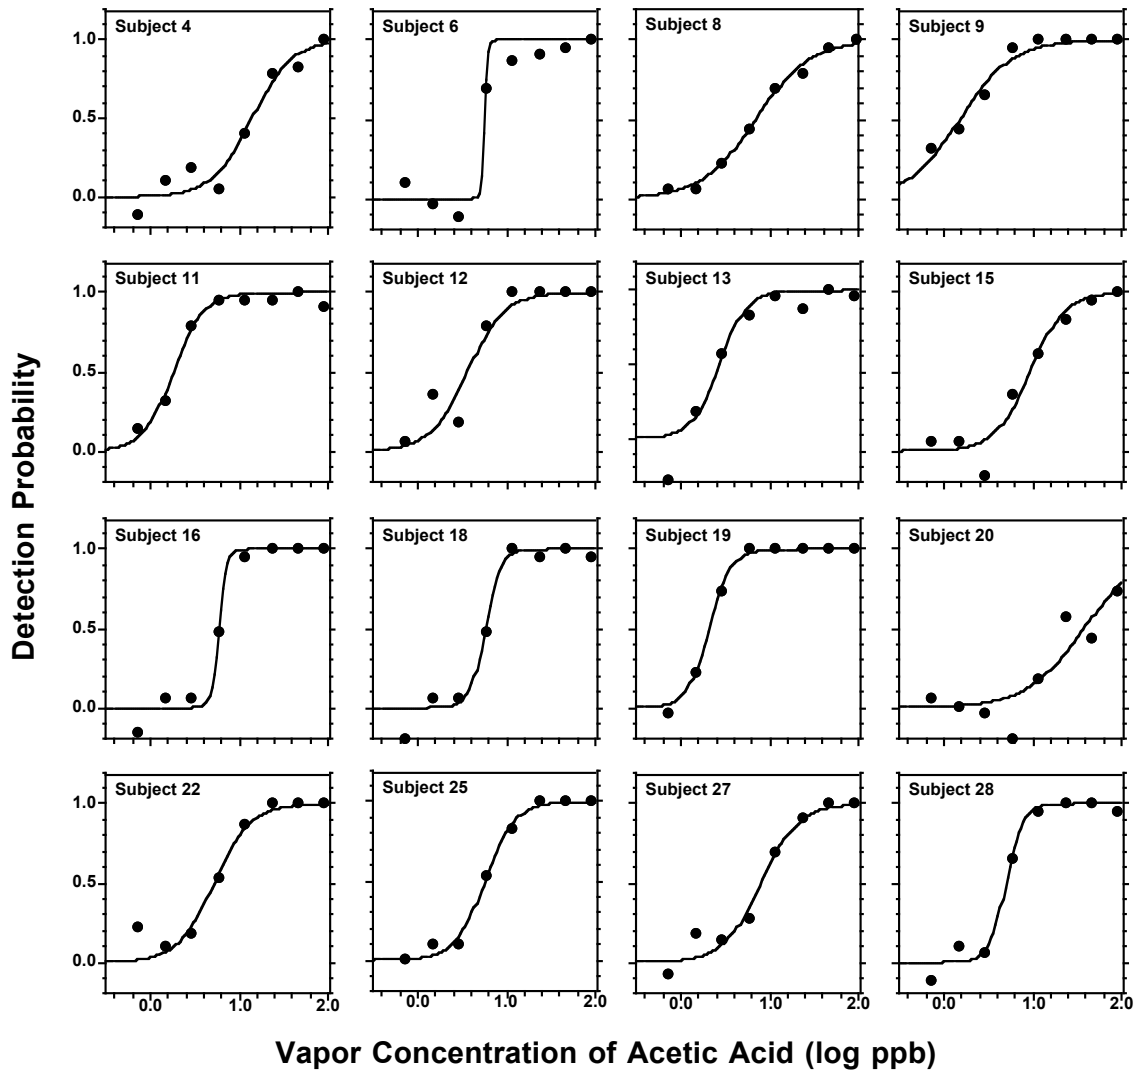

SUPPLEMENTARY FIGURE S3

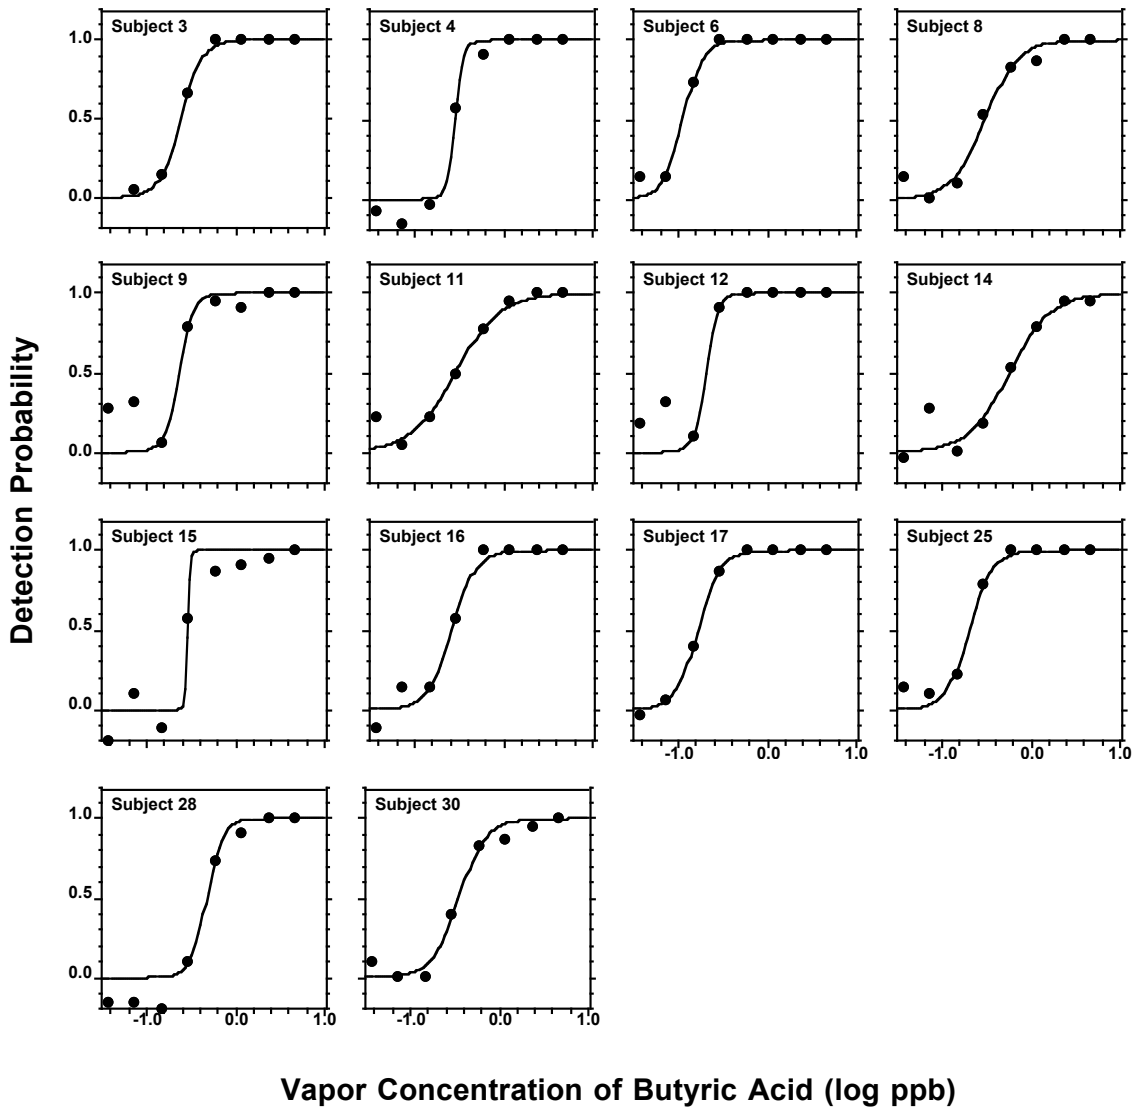

SUPPLEMENTARY FIGURE S4

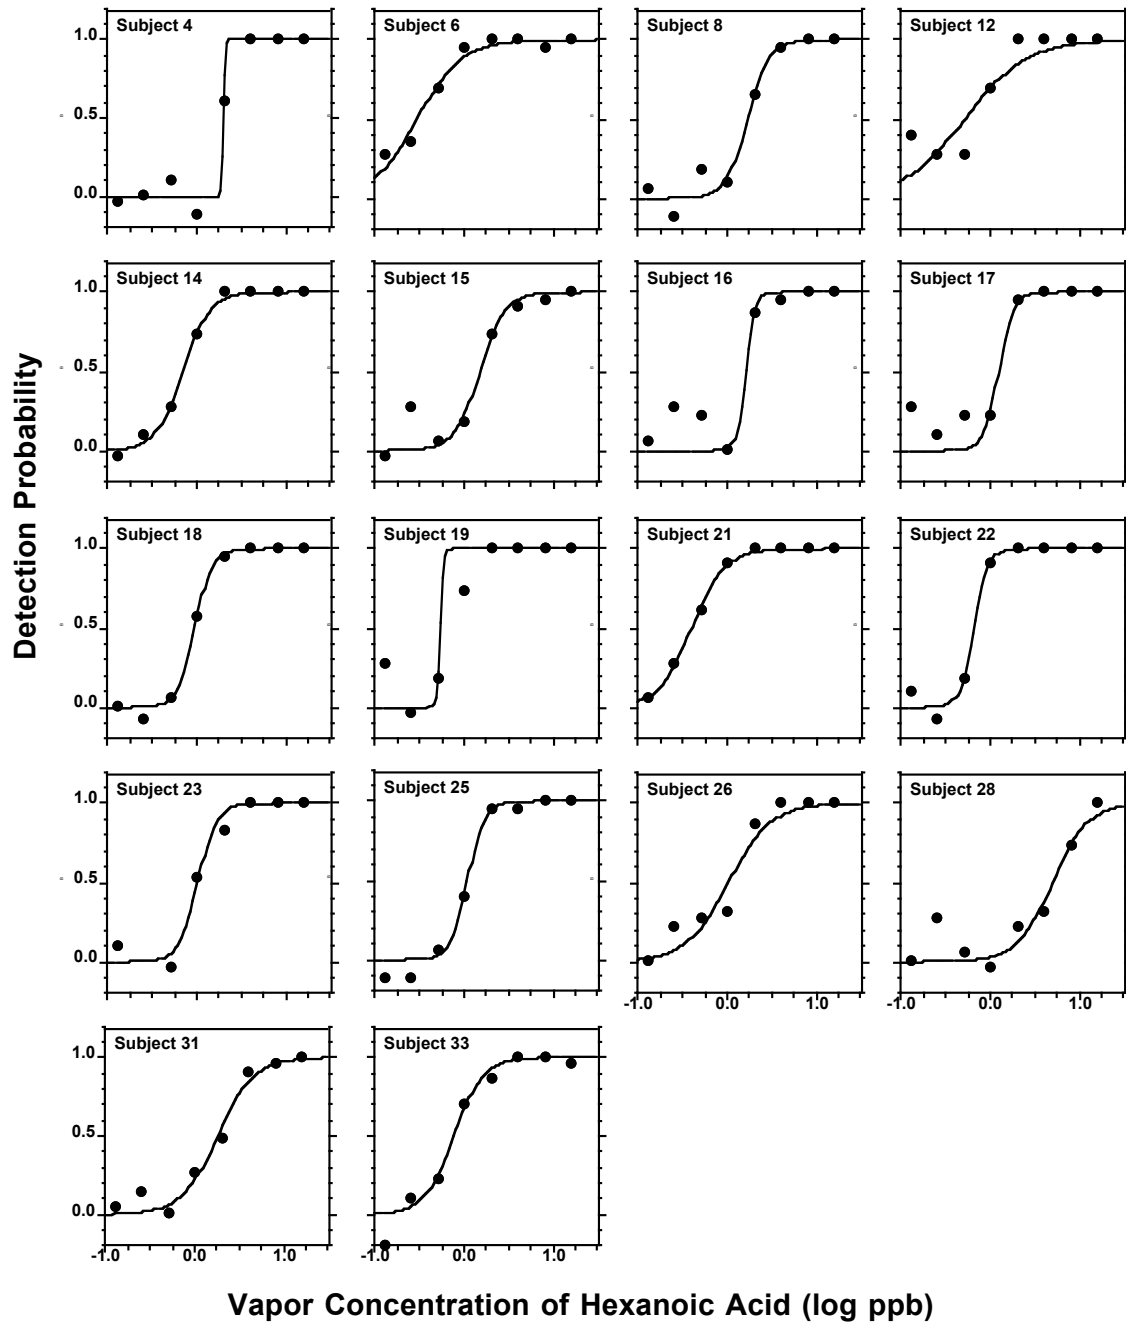

SUPPLEMENTARY FIGURE S5

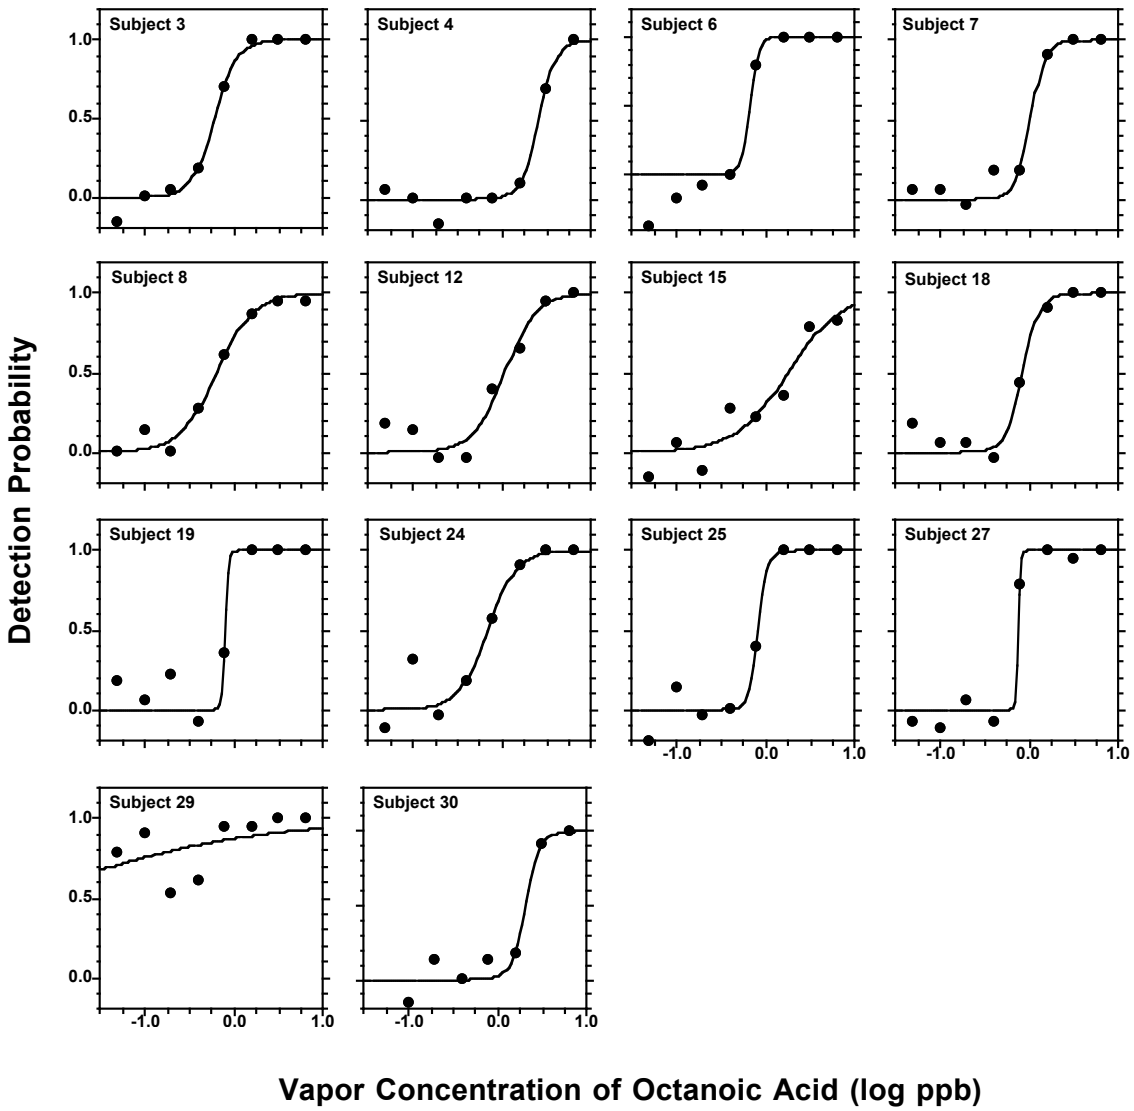

SUPPLEMENTARY FIGURE S6

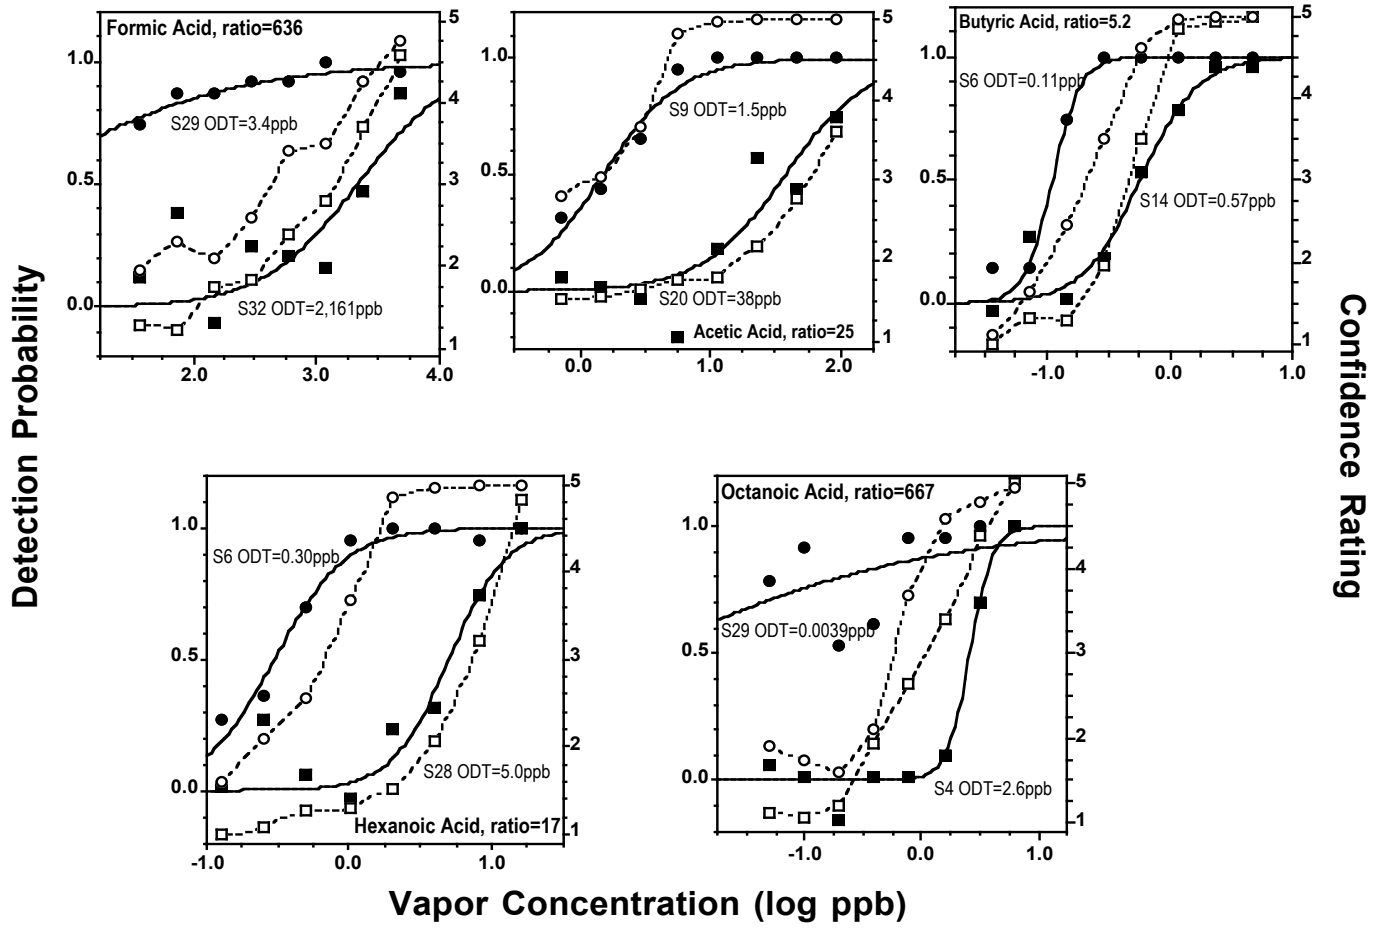

Supplement: NIHMS248431-supplement-01.pdf [file NIHMS248431-supplement-01.pdf]
